# Supplementary material for: Solid additive-assisted morphology optimization enables efficient nonhalogen solvent-processed polymer solar cells
Source: Royal Society of Chemistry journal article supplement (doi:10.1039/d2tc03838b), 2022-11-28
Supplement: d2tc03838b1.pdf [file d2tc03838b1.pdf]

## Support Information

### **Solid additive-assisted morphology optimization enables efficient nonhalogen solvent-processed polymer solar cells**

Xiaoxiao Li,<sup>a</sup> Hang Yang,<sup>a</sup> Hongyu Fan,<sup>a</sup> Kewei Hu,<sup>a</sup> Haoyu Cao,<sup>a</sup> Chaohua Cui,<sup>\*ab</sup> and Yongfang Li<sup>abc</sup>

*<sup>a</sup>Laboratory of Advanced Optoelectronic Materials, Suzhou Key Laboratory of Novel Semiconductor-Optoelectronics Materials and Devices, College of Chemistry Chemical Engineering and Materials Science, Soochow University, Suzhou 215123, China*

*<sup>b</sup>Jiangsu Key Laboratory of Advanced Negative Carbon Technologies, Soochow University, Suzhou, 215123, Jiangsu, PR China*

*<sup>c</sup>Beijing National Laboratory for Molecular Sciences, CAS Key Laboratory of Organic Solids, Institute of Chemistry, Chinese Academy of Sciences, Beijing 100190, China*

*E-mail: cuichaohua@suda.edu.cn*

#### **Experimental details**

Device fabrication and testing: The devices were fabricated with conventional architectures of glass/ITO/PDEOT:PSS/active layer/PDINO/Al. The ITO-coated glass was pre-cleaned and modified by a thin layer of PEDOT: PSS which was spin-cast from a PEDOT:PSS aqueous solution (Baytron P VP AI4083 from H. C. Stark) at 5000 rpm for 40 s, and then dried at 150 °C for 15 min in air. The thickness of the PEDOT: PSS layer is about 30 nm. After the active layer blend solution were spin-coated onto ITO glasses, the electron-transport layer of PDINO (about 5 nm) was spin-coated on top of active layer from the methanol solution with a concentration of 1.0 mg/mL at 3000 rpm for 40 s. After the deposition of active layer, about 100 nm of Al were deposited at a pressure of  $2.0 \times 10^{-5}$  Pa onto the PDINO layer with a shadow

mask.

The current density-voltage ( $J$ - $V$ ) measurement of the OSCs were measured under a illumination of AM 1.5G (100 mW cm<sup>-2</sup>) using a SS-F5-3A solar simulator (AAA grade, 50 × 50 mm<sup>2</sup> photobeam size) of Enli Technology CO., Ltd.. The EQE was measured by using a Solar Cell Spectral Response Measurement System QE-R3011 (Enli Technology Co., Ltd.). The light intensity at each wavelength was calibrated by a standard single-crystal Si solar cell. Masks were made using laser beamcutting technology and had well-defined areas of 0.056 cm<sup>2</sup> to define the effective areas for accurate measurement.

Fabrication details for the PM6:Y6 -based OSCs:

PM6:Y6-based devices: the PM6:Y6 ratio was kept at 1:1.2 (w/w) with the polymer concentration of 12 mg/mL in *o*-xylene solution, and the active layer was spin-coated from the *o*-xylene solution with 0.5 % (v/v) CN then annealed at 110 °C for 10 min, or with the dual additives treatment of 0.5% CN and various weight ratios of BTBT or DTBDT (weight ratio relative to PM6) followed by TA treatment at different temperature. The optimal thickness of active layer is 96~107 nm.

The hole and electron mobilities were calculated by using the space-charge-limited current method.

$$J \cong (9/8)\epsilon\epsilon_0\mu_0V^2 \exp(0.89\sqrt{V/E_0L})/L^3$$

Where  $\epsilon$  is the dielectric constant of the polymers,  $\epsilon_0$  is the permittivity of the vacuum,  $\mu_0$  is the zero-field mobility,  $E_0$  is the characteristic field,  $J$  is the current density, and  $L$  is the thickness of the film.

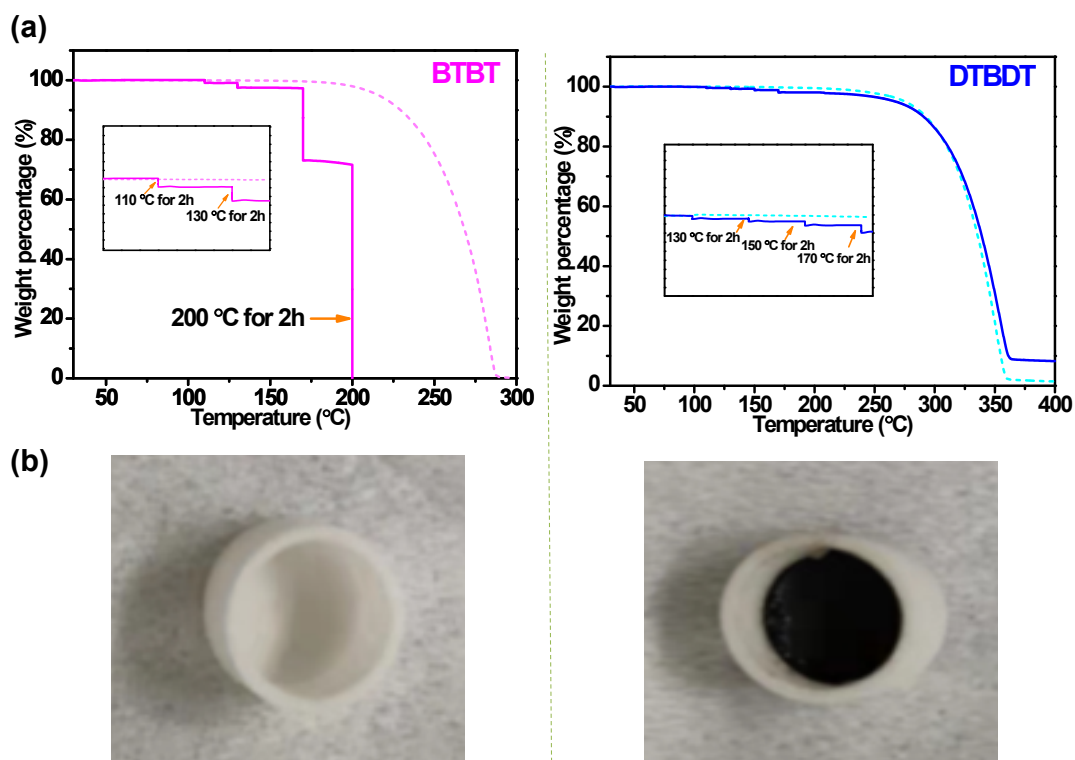

**Figure S1** (a) TGA plot of BTBT and DTBDT at a scan rate of  $10\text{ }^{\circ}\text{C min}^{-1}$  under inert atmosphere. (b) Photos of crucibles with BTBT (left) and DTBDT (right) after the TGA measurements.

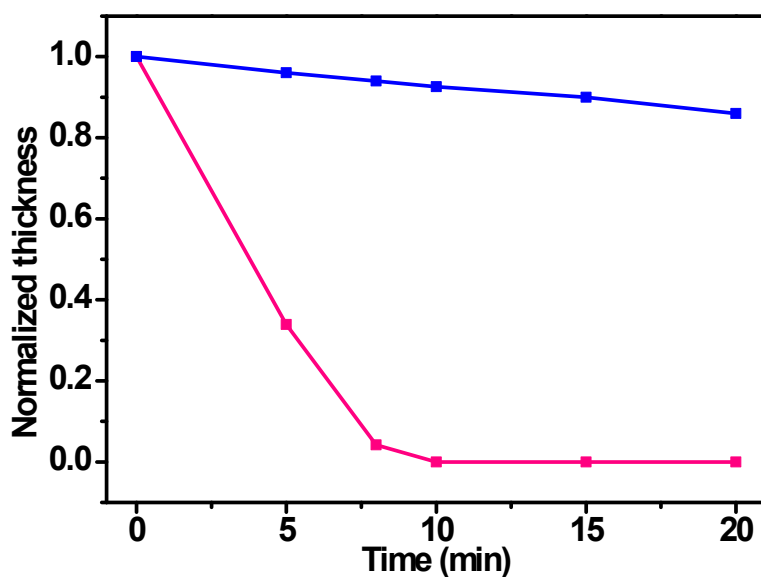

**Figure S2** Normalized film thicknesses of pristine BTBT and DTBDT film spin-coated onto silicon wafer as a function of different duration time of TA under  $110\text{ }^{\circ}\text{C}$  and  $130\text{ }^{\circ}\text{C}$ , respectively.

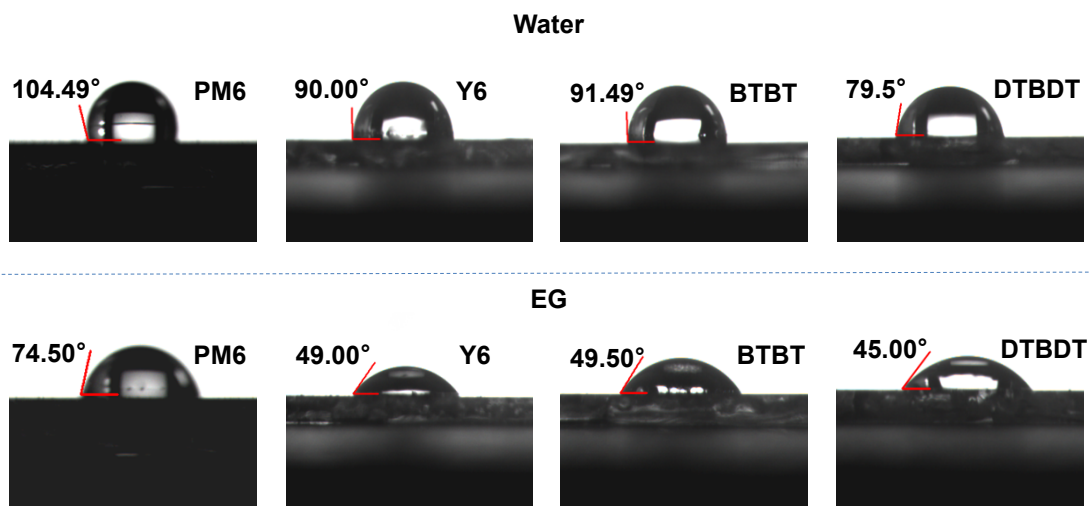

**Figure S3** Contact angles of neat PM6Y6, BTBT, and DTBDT film.

**Table S1** Contact angles and surface tensions of neat Y6, BTBT and DTBDT films.

| Surface | $\gamma$ (mN m <sup>-1</sup> ) |
|---------|--------------------------------|
| PM6     | 29.64                          |
| Y6      | 48.37                          |
| BTBT    | 50.44                          |
| DTBDT   | 38.91                          |

**Table S2** Flory-Huggins interaction parameters of the blend films.

| Blend film | $\chi$ |
|------------|--------|
| Y6:BTBT    | 0.022  |
| Y6: DTBDT  | 0.514  |
| PM6:BTBT   | 2.748  |
| PM6:DTBDT  | 0.629  |

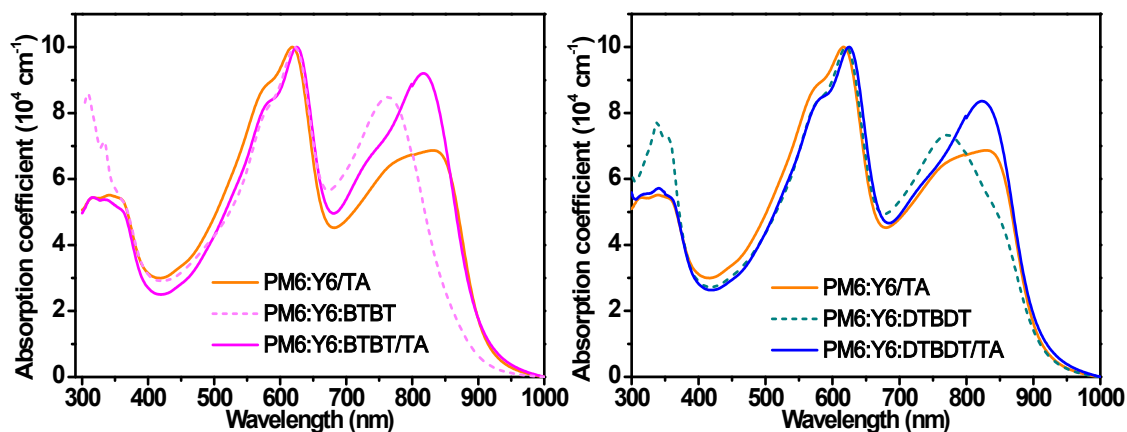

**Figure S4** Absorbance of PM6:Y6 blend film under different treatment.

**Table S3** Photovoltaic performances of the PM6:Y6-based OSCs processed by the solid additive of different weight ratio of BTBT and 0.5% (v/v) CN solvent additive with TA treatment at 110 °C for 10 min, under the illumination of AM 1.5 G, 100 mW cm<sup>-2</sup>.

| BTBT ratio (%) | $V_{oc}$ (V) | $J_{sc}$ (mA cm <sup>-2</sup> ) | FF (%) | PCE (%) |
|----------------|--------------|---------------------------------|--------|---------|
| 0              | 0.789        | 19.62                           | 66.3   | 10.25   |
| 20             | 0.792        | 25.56                           | 74.7   | 15.06   |
| 25             | 0.791        | 25.81                           | 75.5   | 15.42   |
| 30             | 0.811        | 26.14                           | 77.3   | 16.37   |
| 40             | 0.791        | 25.87                           | 73.9   | 15.13   |
| 50             | 0.787        | 25.54                           | 73.6   | 14.80   |

**Table S4** Photovoltaic performances of the PM6:Y6-based PSCs processed by 0.50% CN + 30% BTBT additives and TA at different temperature for 10 min under the illumination of AM 1.5 G, 100 mW cm<sup>-2</sup>.

| TA temperature (°C) | $V_{oc}$ (V) | $J_{sc}$ (mA cm <sup>-2</sup> ) | FF (%) | PCE (%) |
|---------------------|--------------|---------------------------------|--------|---------|
| /                   | 0.814        | 22.36                           | 63.3   | 11.53   |
| 90                  | 0.813        | 24.69                           | 73.6   | 14.77   |
| 110                 | 0.811        | 26.14                           | 77.3   | 16.37   |
| 130                 | 0.807        | 26.28                           | 74.3   | 15.76   |

**Table S5** Photovoltaic performances of the PM6:Y6-based PSCs processed by different additive treatment under the illumination of AM 1.5 G, 100 mW cm<sup>-2</sup>.<sup>a</sup>

| additive | $V_{oc}$ (V)             | $J_{sc}$ (mA cm <sup>-2</sup> ) | FF                       | PCE (%)                 |
|----------|--------------------------|---------------------------------|--------------------------|-------------------------|
| /        | 0.777<br>(0.776 ± 0.002) | 17.63<br>(17.32 ± 0.23)         | 64.65<br>(0.653 ± 0.007) | 8.86<br>(8.90 ± 0.14)   |
| CN       | 0.789<br>(0.786 ± 0.004) | 19.62<br>(18.52 ± 0.13)         | 0.663<br>(0.662 ± 0.006) | 10.25<br>(10.25 ± 0.11) |
| BTBT     | 0.823<br>(0.821 ± 0.003) | 25.79<br>(25.98 ± 0.16)         | 0.739<br>(0.738 ± 0.004) | 15.68<br>(15.70 ± 0.09) |
| CN+BTBT  | 0.811<br>(0.813 ± 0.003) | 26.14<br>(26.09 ± 0.22)         | 0.773<br>(0.772 ± 0.006) | 16.37<br>(16.35 ± 0.13) |

<sup>a</sup>The statistical values in brackets were calculated from 10 devices.

**Table S6** Photovoltaic performances of the PM6:Y6-based OSCs processed by the solid additive of different weight ratio of DTBBDT and 0.5% (v/v) CN solvent additive with TA treatment at 130 °C for 10 min, under the illumination of AM 1.5 G, 100 mW cm<sup>-2</sup>.

| DTBBDT ratio (%) | $V_{oc}$ (V) | $J_{sc}$ (mA cm <sup>-2</sup> ) | FF (%) | PCE (%) |
|------------------|--------------|---------------------------------|--------|---------|
| 0                | 0.789        | 19.62                           | 66.3   | 10.25   |
| 20               | 0.793        | 23.99                           | 66.1   | 12.57   |
| 25               | 0.794        | 25.69                           | 69.3   | 14.14   |
| 30               | 0.798        | 25.28                           | 71.4   | 14.40   |
| 40               | 0.787        | 23.44                           | 66.6   | 12.18   |
| 50               | 0.774        | 22.57                           | 61.6   | 10.75   |

**Table S7** Photovoltaic performances of the PM6:Y6-based OSCs processed by 0.50% CN + 30% DTBBDT additives and TA at different temperature for 10 min under the illumination of AM 1.5 G, 100 mW cm<sup>-2</sup>.

| TA temperature (°C) | $V_{oc}$ (V) | $J_{sc}$ (mA cm <sup>-2</sup> ) | FF (%) | PCE (%) |
|---------------------|--------------|---------------------------------|--------|---------|
| /                   | 0.812        | 20.07                           | 47.2   | 7.66    |

|     |       |       |      |       |
|-----|-------|-------|------|-------|
| 110 | 0.783 | 25.13 | 70.7 | 13.87 |
| 130 | 0.798 | 25.28 | 71.4 | 14.40 |
| 150 | 0.753 | 25.62 | 67.9 | 12.92 |

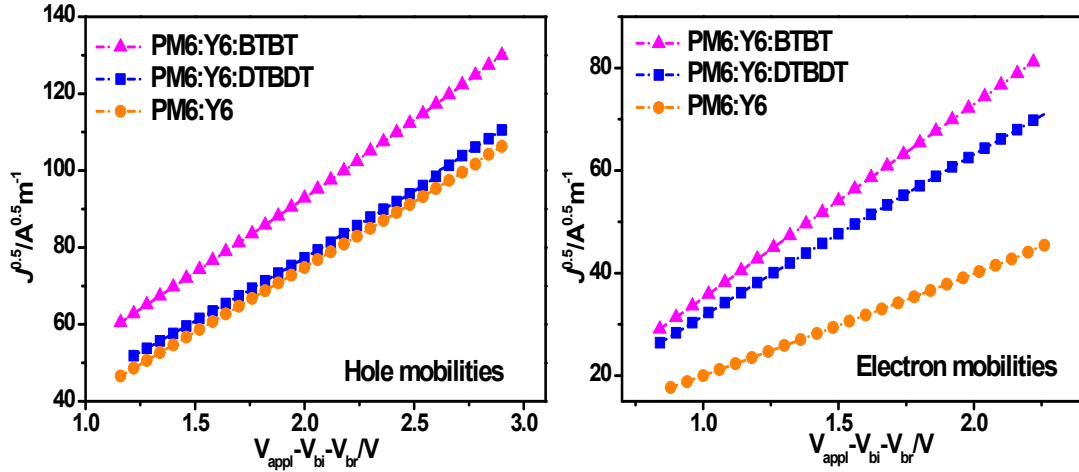

**Figure S5**  $J^{0.5}$  vs  $(V_{\text{appl}} - V_{\text{bi}} - V_{\text{br}})$  plots of hole-only and electron-only devices of PM6:Y6 (1:1.2, w/w) processed with different additive treatment.

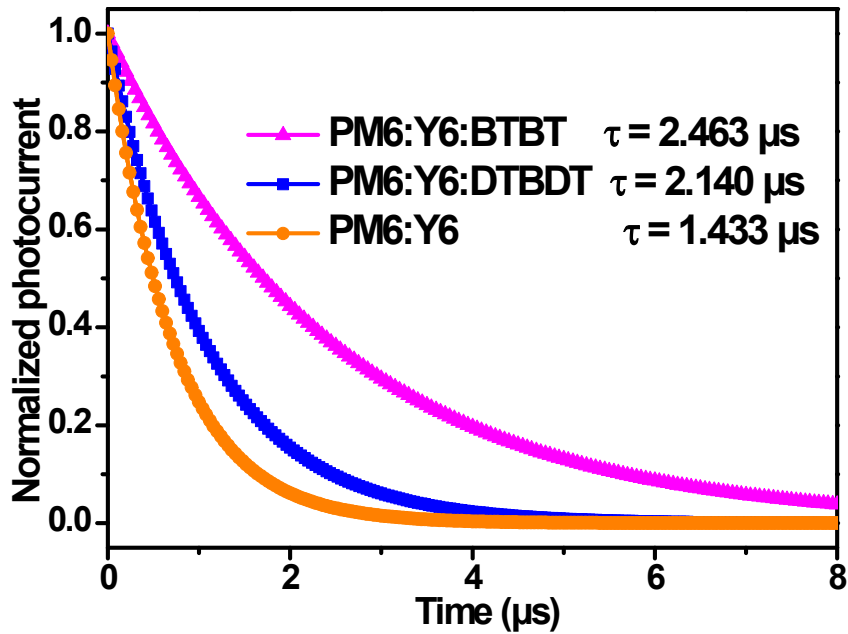

**Figure S6** TPV measurements of the PM6:Y6-based PSCs processed with different additive treatment.

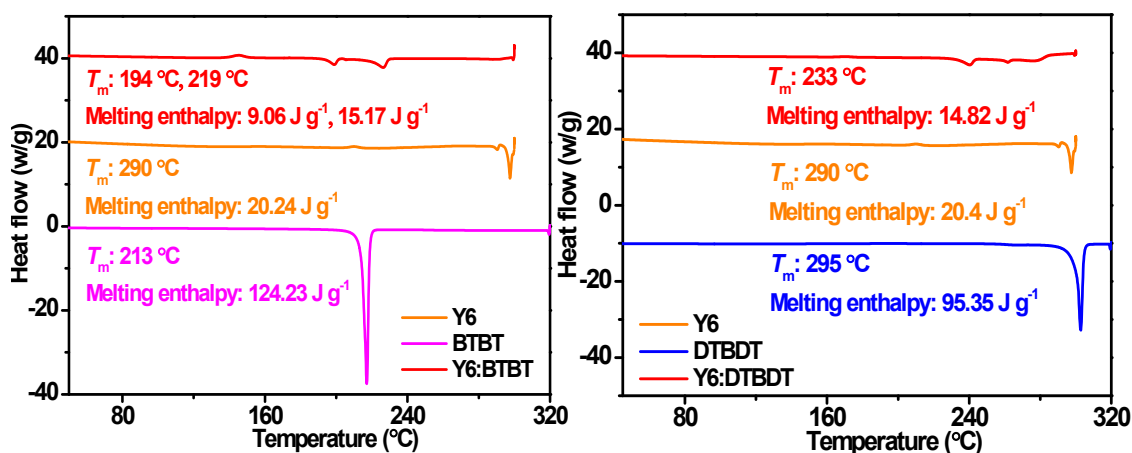

Figure S7 (a) DSC thermograms (the first heating cycle) of BTBT, Y6, and Y6:BTBT (4:1, w/w), the mixtures were prepared by solution-cast method (dissolving the mixture of DIB and Y6 in *o*-XY and then removing the solvent). (b) DSC thermograms (the first heating cycle) of DTBBDT, Y6, and Y6:DTBBDT (4:1, w/w) by solution-cast method.

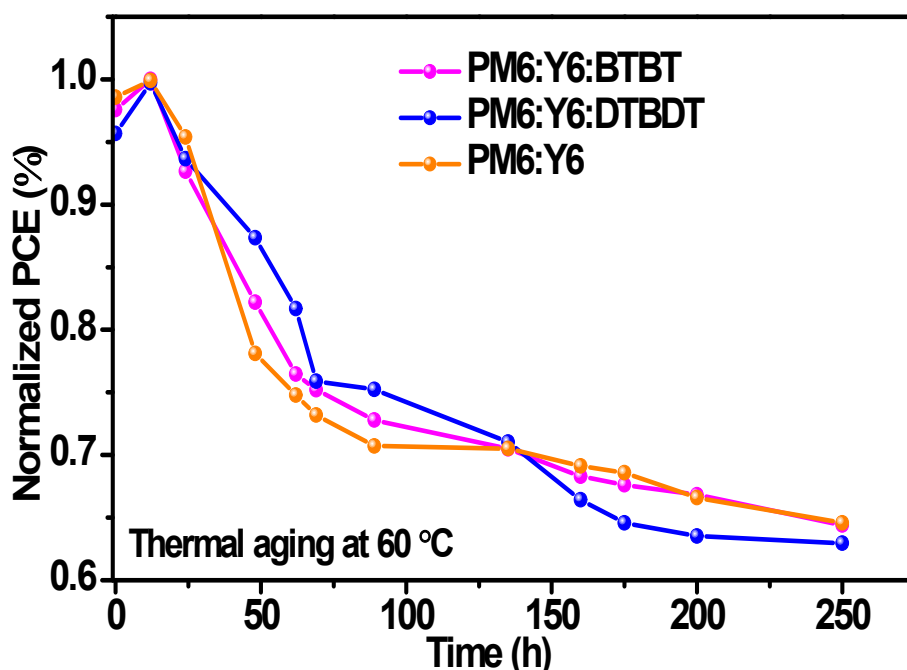

Figure S8 Normalized PCEs of PM6:Y6-based PSCs processed with different additive treatment over the 60 °C thermal aging time in a nitrogen-filled glovebox.
